# Supplementary material for: Catalytic, Theoretical, and Biological Investigations of Ternary Metal (II) Complexes Derived from L-Valine-Based Schiff Bases and Heterocyclic Bases
Source: MDPI journal article supplement (doi:10.3390/molecules28072931), 2023-03-24
Supplement: s1 [file s1]

# Catalytic, Theoretical, and Biological Investigations of Ternary Metal (II) Complexes Derived from L-Valine-Based Schiff Bases and Heterocyclic Bases

Gopalakrishnan Sasikumar <sup>1</sup>, Annadurai Subramani <sup>2</sup>, Ramalingam Tamilarasan <sup>3</sup>, Punniyamurthy Rajesh <sup>4</sup>, Ponnusamy Sasikumar <sup>5,\*</sup>, Salim Albukhaty <sup>6</sup>, Mustafa K. A. Mohammed <sup>7</sup>, Subramani Karthikeyan <sup>8</sup>, Zaidon T. Al-aqbi <sup>9</sup>, Faris A. J. Al-Doghachi <sup>10</sup> and Yun Hin Taufiq-Yap <sup>11,12,\*</sup>

<sup>1</sup> Department of Chemistry, St. Joseph's College of Engineering, Chennai 600 119, Tamil Nadu, India

<sup>2</sup> Department of biochemistry, Dwaraka Doss Goverdhan Doss Vaishnav College, Chennai 600 106, Tamil Nadu, India

<sup>3</sup> Department of Chemistry, Vel Tech Multi Tech Dr. Rangarajan Dr. Sakunthala Engineering College, Chennai 600 062, Tamil Nadu, India

<sup>4</sup> Department of Physics, Vels Institute of Science, Technology and Advance Studies of Basic Science, Chennai 600 017, Tamil Nadu, India

<sup>5</sup> Department of Physics, Saveetha School of Engineering, SIMATS, Chennai 602 701, Tamil Nadu, India

<sup>6</sup> Department of Chemistry, College of Science, University of Misan, Maysan 62001, Iraq

<sup>7</sup> Radiological Techniques Department, Al-Mustaqbal University College, Hillah 51001, Babylon, Iraq

<sup>8</sup> Department of Physics, Periyar University Centre for Post Graduate and Research Studies, Dharmapuri 636 701, Tamil Nadu, India

<sup>9</sup> College of Agriculture, University of Misan, Al-Amara, Misan 62001, Iraq

<sup>10</sup> Department of Chemistry, Faculty of Science, University of Basrah, Basrah 61004, Iraq

<sup>11</sup> Catalysis Science and Technology Research Centre, Faculty of Science, Universiti Putra Malaysia, Serdang 43400, Selangor, Malaysia

<sup>12</sup> Faculty of Science and Natural Resources, University Malaysia Sabah, Kota Kinabalu 88400, Sabah, Malaysia

\* Correspondence: sasijanaki123@gmail.com (P.S.); taufig@upm.edu.my (Y.H.T.-Y.)

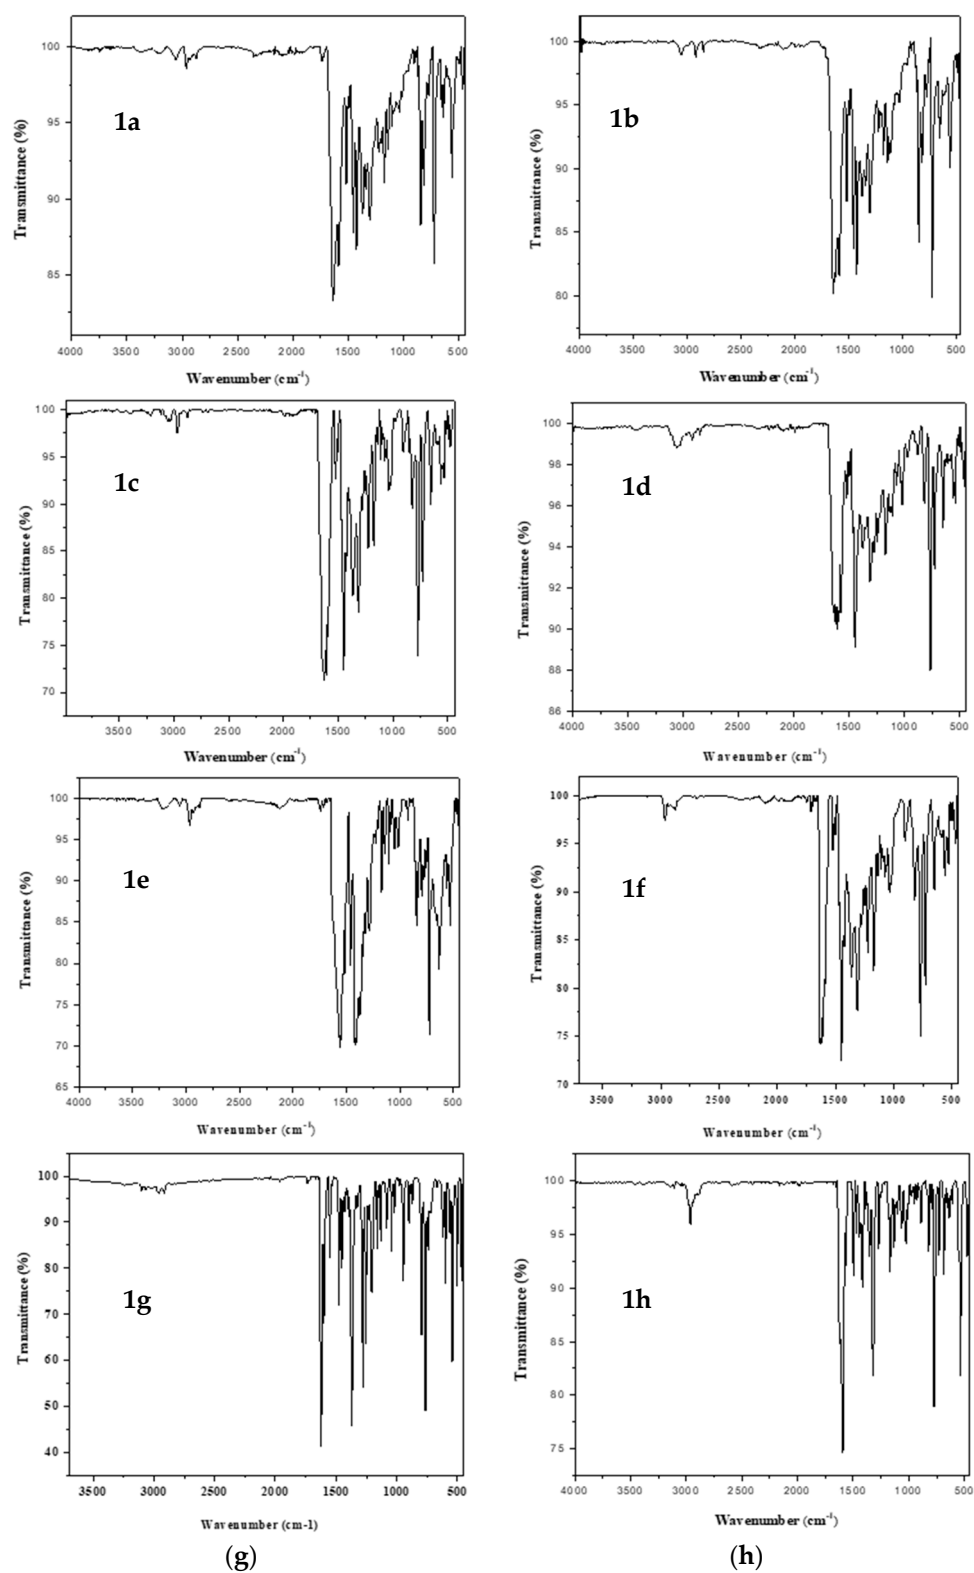

Figure S1. FT-IR spectra of metal(II) complexes **1a–1h**.

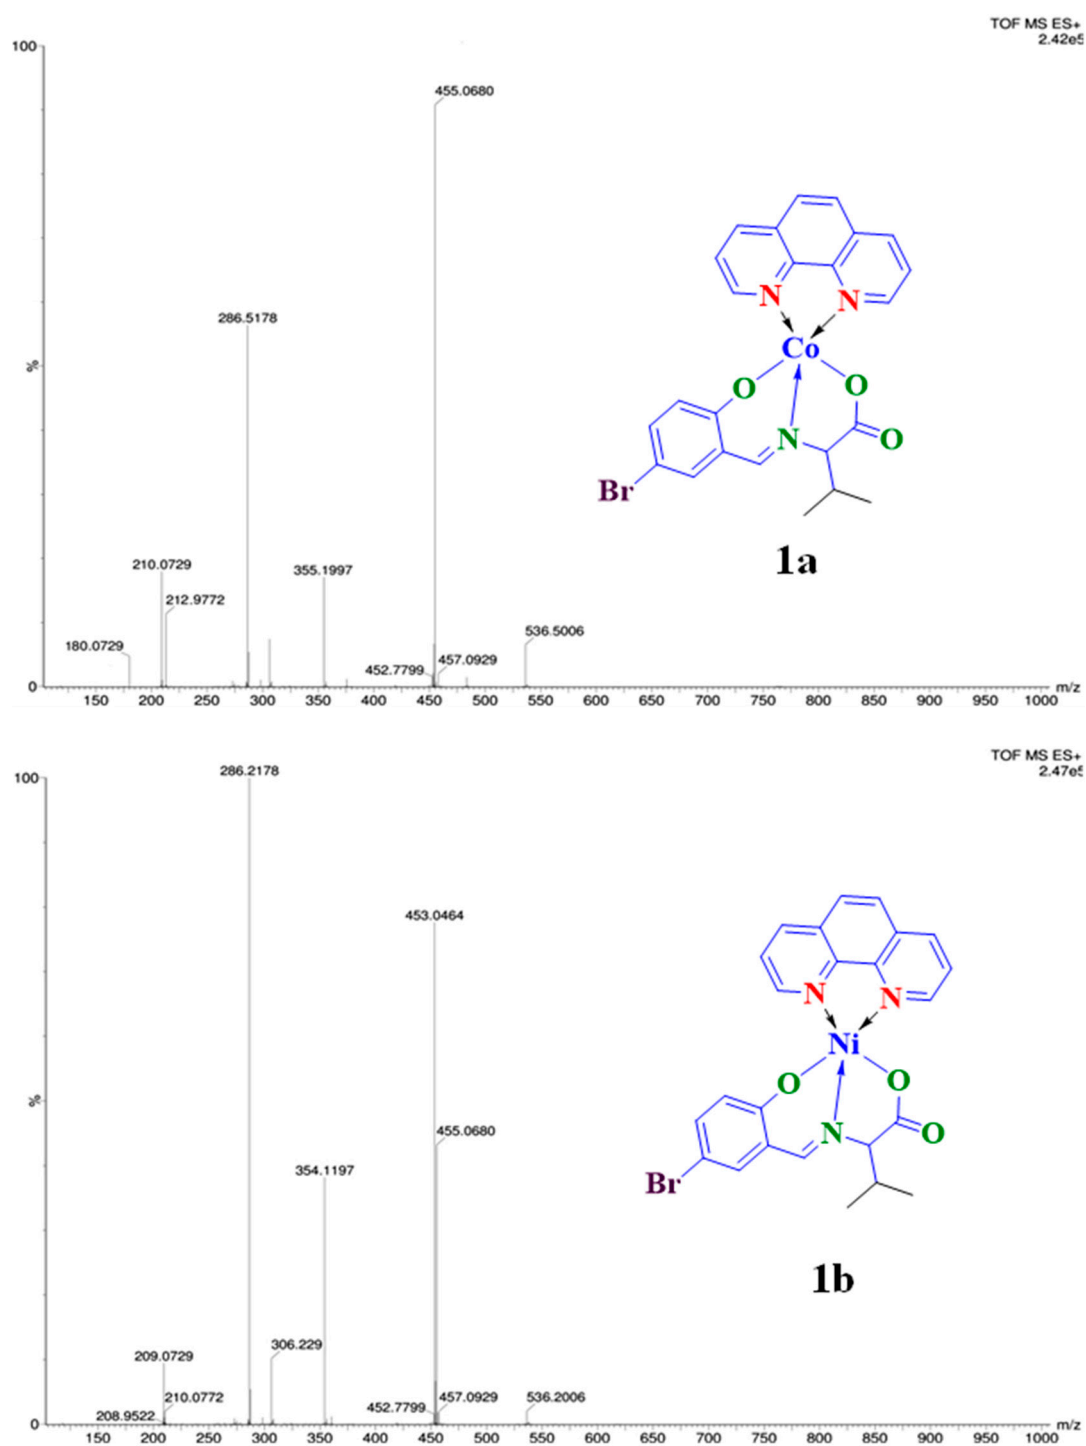

Figure S2. ESI-Mass spectra of metal(II) complexes [Co(L)(phen)] **1a** and [Ni(L)(phen)] **1b**.

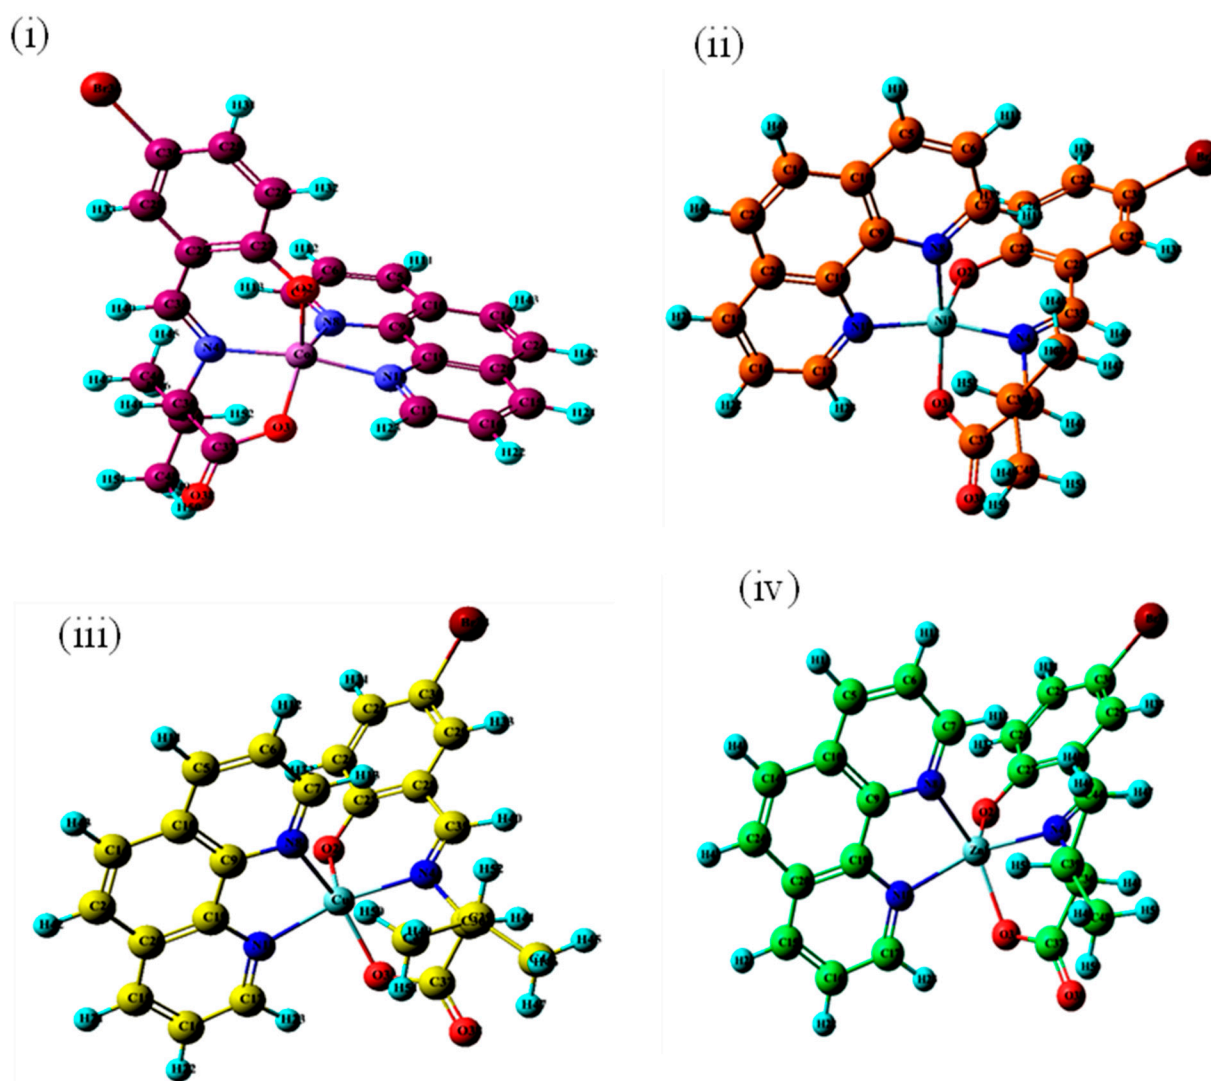

**Figure S3.** Optimized molecular structure of (i) cobalt(II) complex 1a, (ii) nickel(II) complex 1b, (iii) copper(II) complex 1c and (iv) zinc(II) complex 1d using B3LYP/LACVP++ basis set.

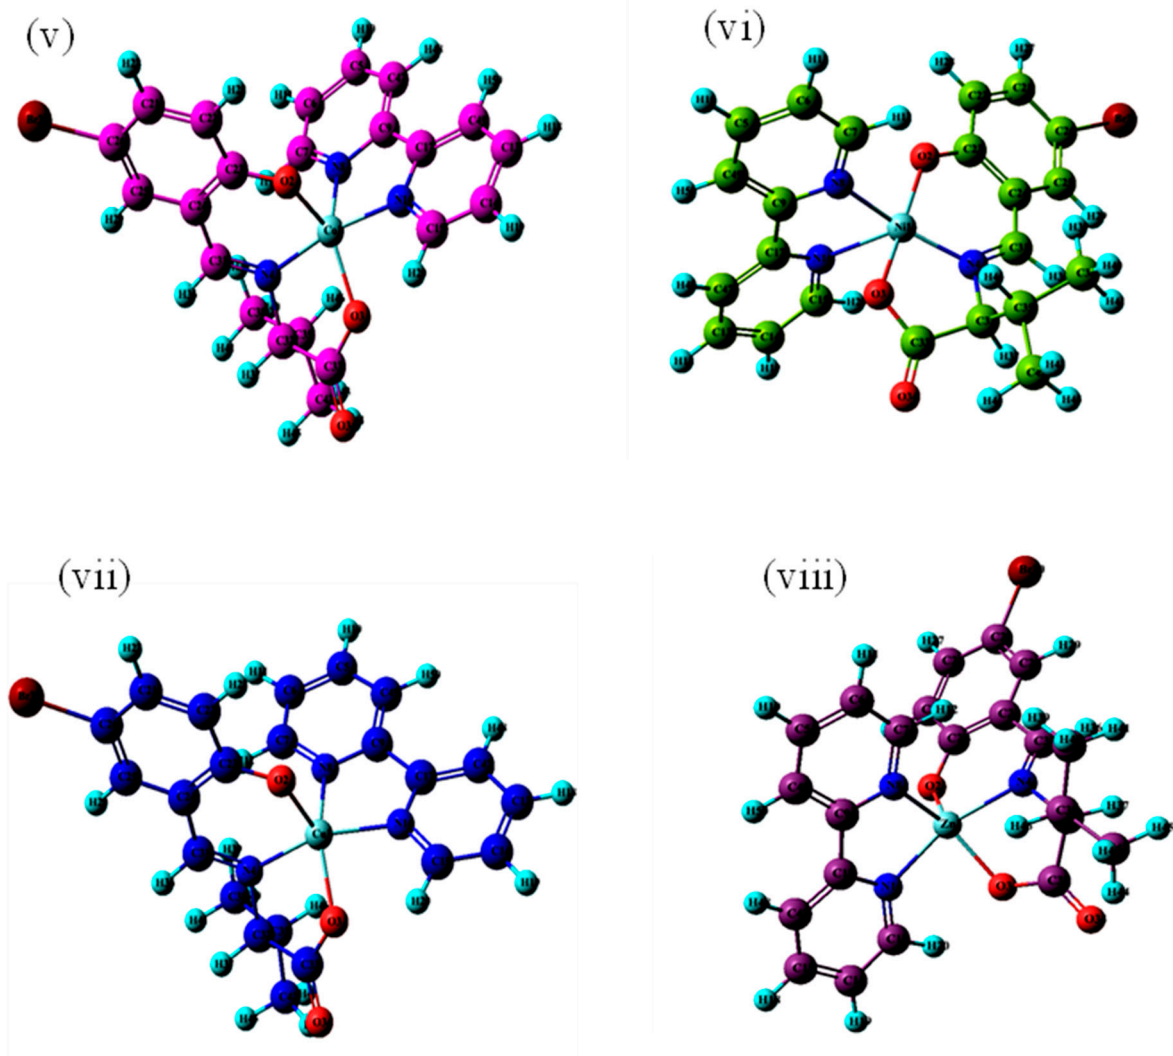

**Figure S4.** Optimized molecular structure of (v) cobalt(II) complex 1e, (vi) nickel(II) complex 1f, (vii) copper(II) complex 1g and (viii) zinc(II) complex 1h using B3LYP/LACVP++ basis set.
